# Supplementary material for: Temperature dependence of the contribution of soil moisture to soil respiration and the soil respiration temperature threshold in a temperate deciduous forest
Source: Copernicus journal article supplement (doi:10.5194/egusphere-2026-605), 2026-02-10
Supplement: Supplementary file 1 [file egusphere-2026-605-supplement.pdf]

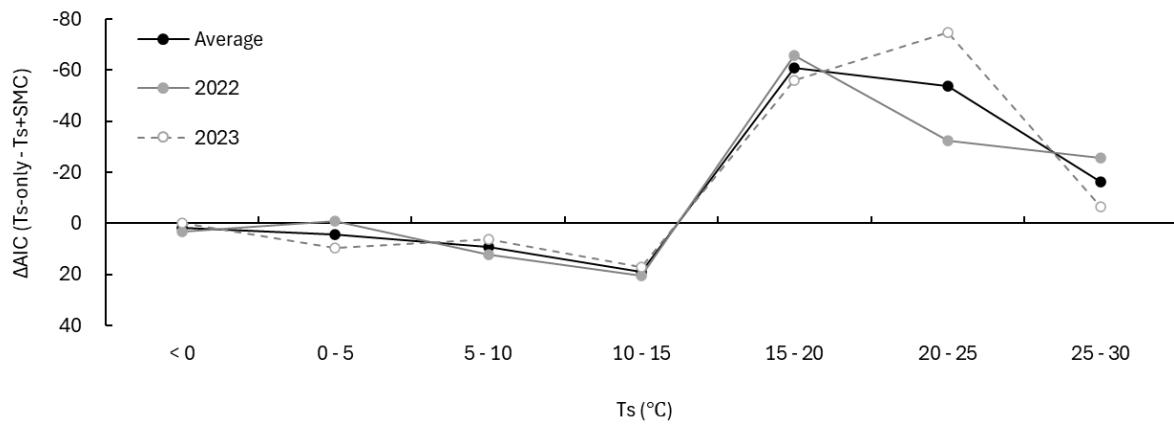

**Figure S1:** SMC related model fit improvement ( $\Delta AIC$ ) by Ts bin. The effect of including SMC was quantified as the difference in AIC between the Ts only model and the Ts plus SMC model ( $\Delta AIC$ ). Negative  $\Delta AIC$  values indicate improved model fit when SMC is included. The gray solid line indicates 2022, the gray dashed line indicates 2023, and the black solid line indicates the mean across both years.

**Table S1:** Model comparison using AIC to determine the optimal number of temperature breakpoints in the relationship between Rs and Ts and to evaluate goodness of fit across candidate models.

| Year | Model                               | Breakpoint | k | AIC     |
|------|-------------------------------------|------------|---|---------|
| 2022 | Exponential                         | 0          | 2 | 3469.96 |
|      | segmented regression(1 breakpoints) | 1          | 4 | 3449.61 |
|      | segmented regression(2 breakpoints) | 2          | 6 | 3457.95 |
| 2023 | Exponential                         | 0          | 2 | 3562.32 |
|      | segmented regression(1 breakpoints) | 1          | 4 | 3449.92 |
|      | segmented regression(2 breakpoints) | 2          | 6 | 3512.06 |
